# Supplementary material for: Temperature dependence of the photoluminescence from ZnO microrods prepared by a float zone method
Source: Royal Society of Chemistry journal article supplement (doi:10.1039/c6ce00349d), 2016-01-01
Supplement: c6ce00349d1.pdf [file c6ce00349d1.pdf]

## Electronic Supplementary Information

### Temperature Dependent of Photoluminescence Studies in ZnO Microrods by FZ Method

Xingyuan Guo,<sup>a</sup> Carl P. Tripp,<sup>b</sup> Changfeng Chen,<sup>b</sup> Yan Wang,<sup>c</sup> Shengyan Yin,<sup>d</sup> Weiping Qin<sup>\*d</sup>

<sup>a</sup>Key Laboratory of Physics and Technology for Advanced Batteries (Ministry of Education), College of Physics, Jilin University, Changchun 130012, China.

<sup>b</sup>Laboratory for Surface Science and Technology and Department of Chemistry, University of Maine, Orono ME 04468, USA.

<sup>c</sup>College of Chemistry, Jilin university, Changchun 130012, China.

<sup>d</sup>State Key Laboratory on Integrated Optoelectronics, College of Electronic Science and Engineering, Jilin University, Changchun, 130012, China.

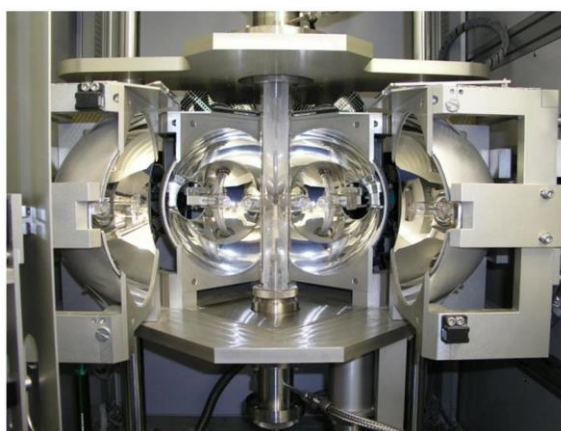

Figure S1: Photograph of a commercial optical floating zone furnace (image furnace): model FZ-T-10000-H-VI-VP, CSI Japan.

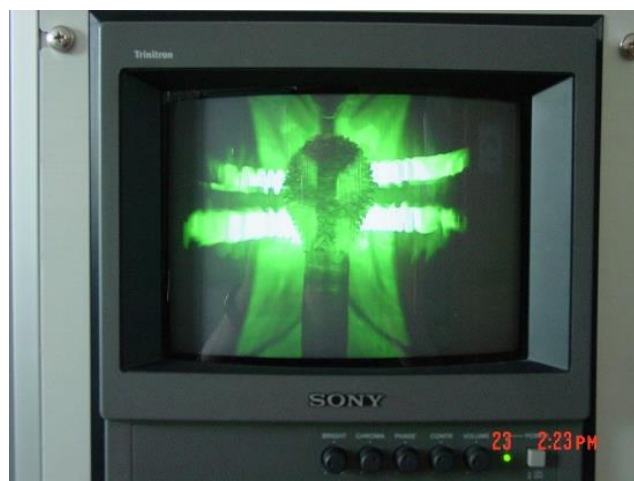

Figure S2: The growth morphology image of the ZnO microrods observed in the FZ furnace.

---

\* Corresponding author. Tel: 86-431-85153853; Fax: 86-431-85168241-8325.  
E-mail address: wpqin@jlu.edu.cn (WP. Qin).

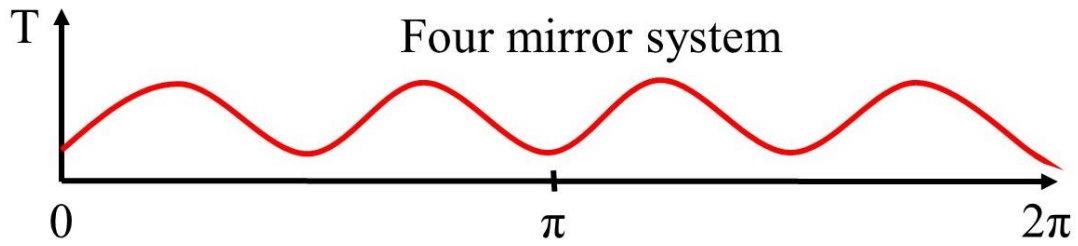

Figure S3: Temperature profile for four mirror used in the FZ furnace around the horizontal plane.

The similar temperature profile can be found from the website:

[http://www.crystalsys.co.jp/english/product02\\_e.html](http://www.crystalsys.co.jp/english/product02_e.html) or <http://scidre.de/index.php?id=12>.

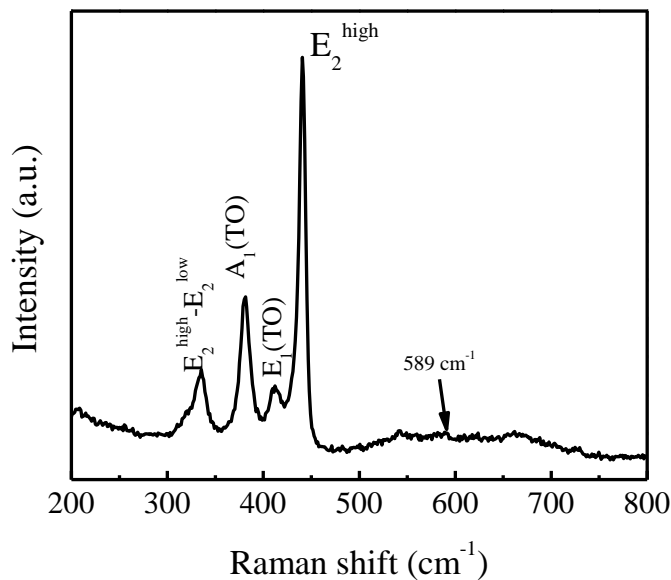

Figure S4: Raman spectrum of the ZnO microrods at room temperature

As shown in S4, four peaks at 331, 383, 412 and 436  $\text{cm}^{-1}$  were observed. The peak at 436  $\text{cm}^{-1}$  is attributed to ZnO non-polar optical phonons of the  $E_2^{\text{high}}$  mode, the peak at 412  $\text{cm}^{-1}$ , 383  $\text{cm}^{-1}$  and 331  $\text{cm}^{-1}$  corresponds to  $E_1(\text{TO})$ ,  $A_1(\text{TO})$  and  $E_2^{\text{high}}-E_2^{\text{low}}$  symmetry, respectively.<sup>[1-3]</sup> The peak at 589  $\text{cm}^{-1}$  is related to local vibrational modes associated with intrinsic lattice defects.<sup>[3]</sup> This peak is weak in intensity which is consistent with the presence of low defect levels in the ZnO microrods.

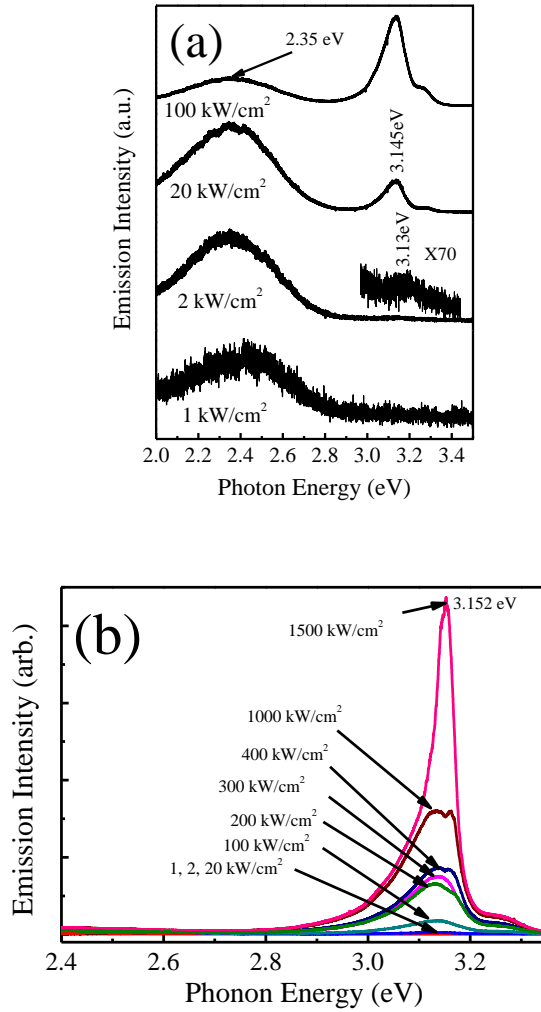

Figure S5: (a) Room temperature PL spectra of as prepared ZnO microrods recorded at different excitation intensities from 1 kW/cm<sup>2</sup> to 100 kW/cm<sup>2</sup>. (b) Luminescence spectra as the as a function of excitation intensity is increased from power density.

S5(a) shows the evolution of the band edge at room temperature as the excitation intensity is increased from 1 kW/cm<sup>2</sup> to 100 kW/cm<sup>2</sup>. At low excitation intensities (1 kW/cm<sup>2</sup>), a visible green fluorescence emission at 2.35 eV (527 nm) was observed due to the presence of ZnO defects.<sup>[4, 5]</sup> As the excitation intensity reaches 2 kW/cm<sup>2</sup>, a second peak emerges at 3.145 eV (394 nm) which is due to the recombination of the free excitons of ZnO. At excitation intensities above 100 kW/cm<sup>2</sup>, the free excitons peak dominates at PL spectra, as shown in S 5(b).

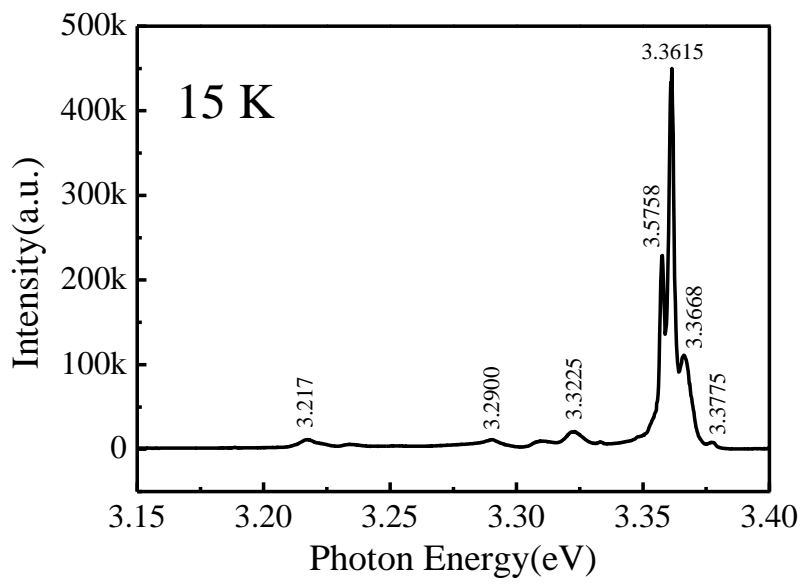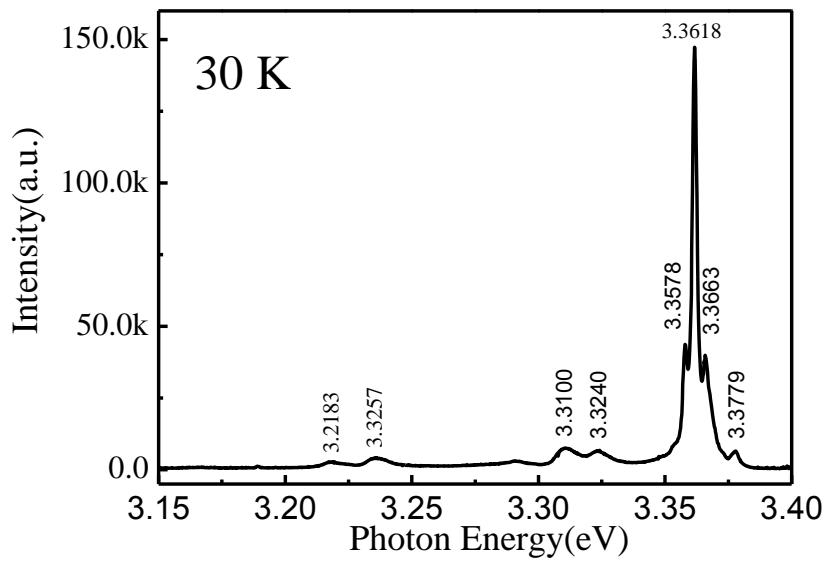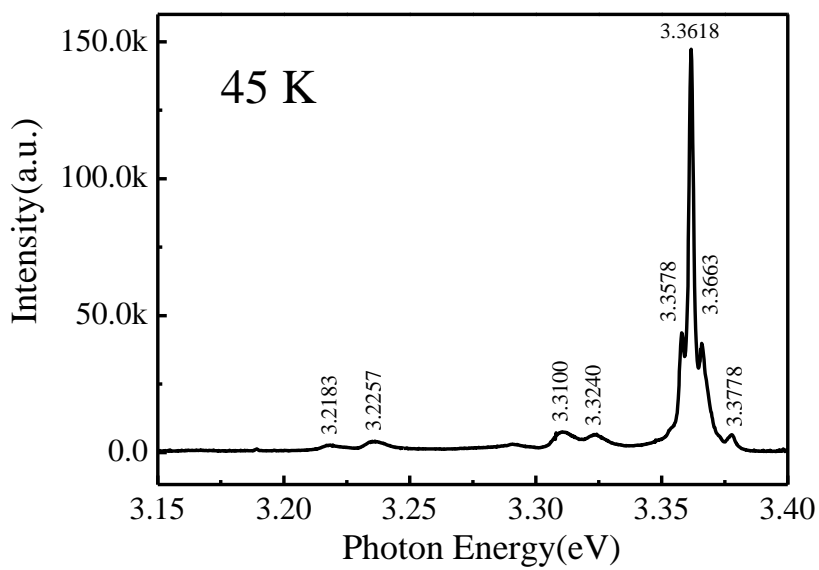

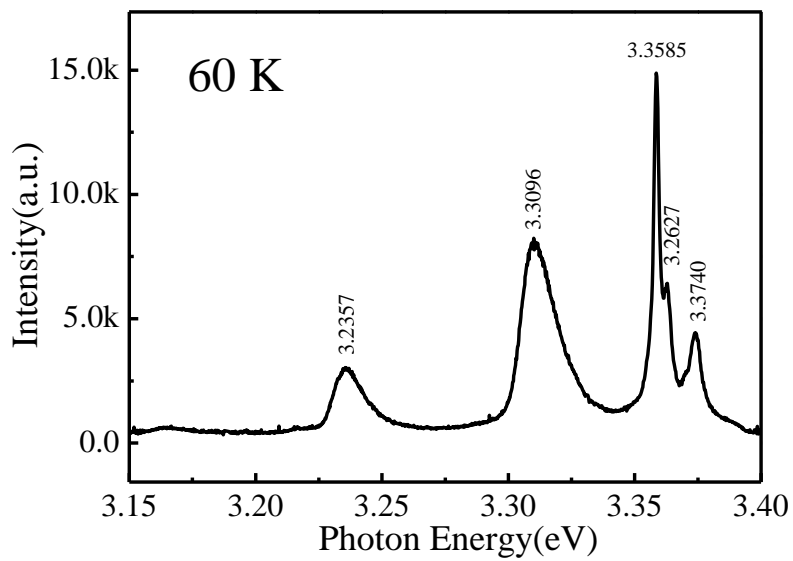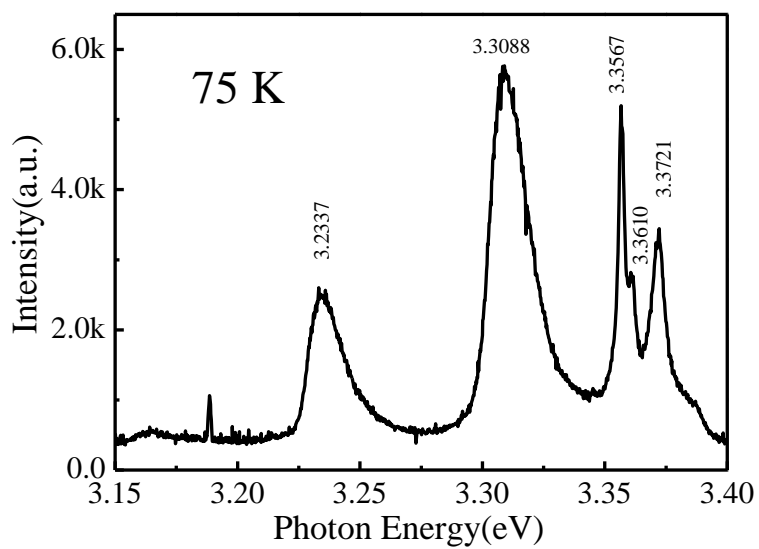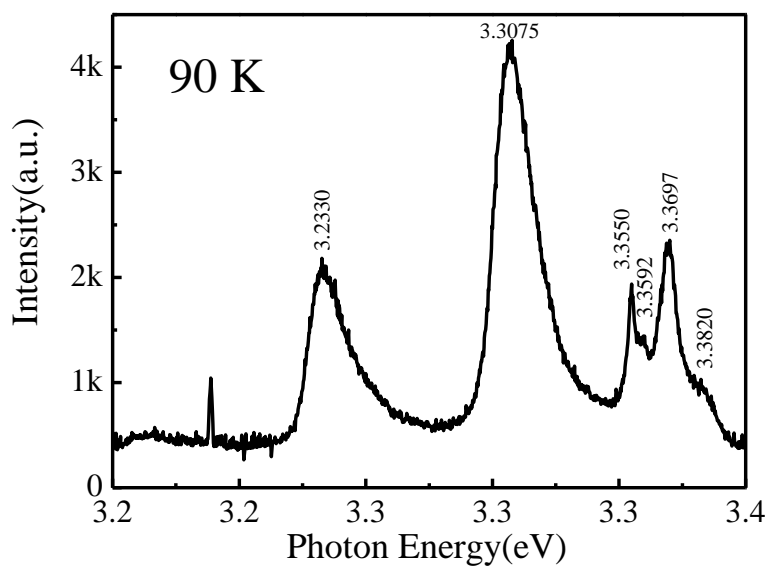

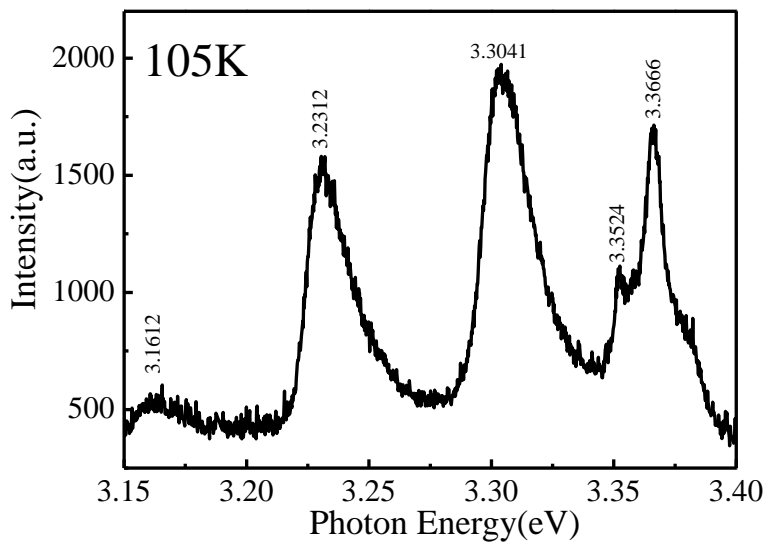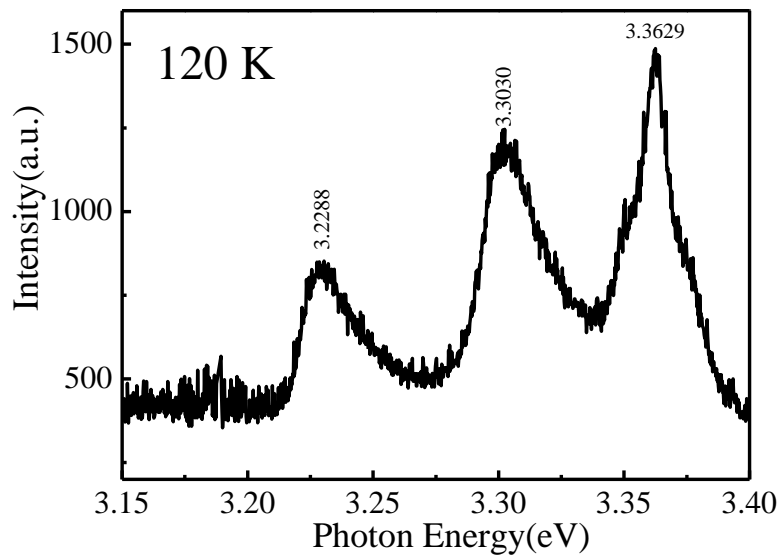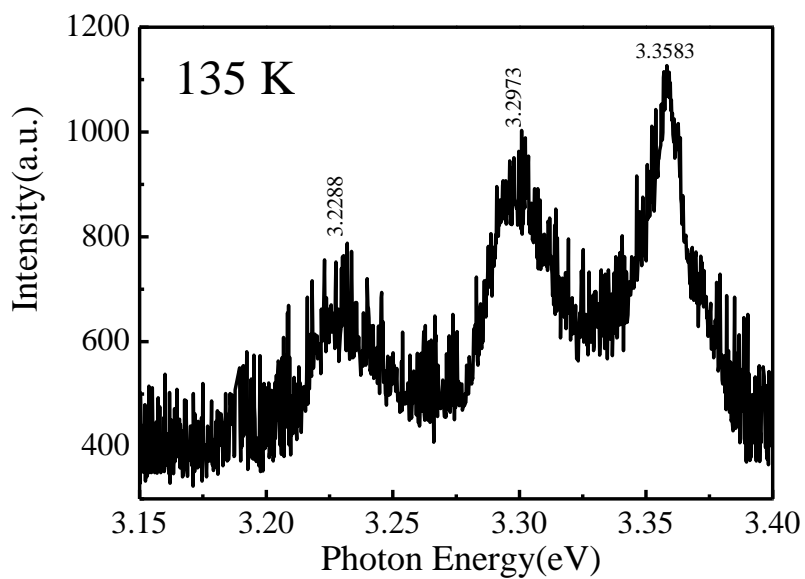

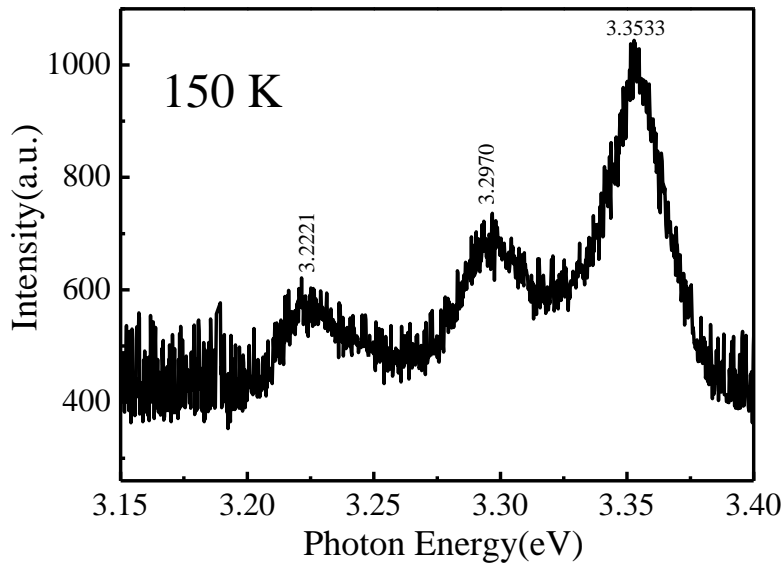

S6 PL spectra at different temperatures

## Reference

1. Arguello, C.A., D.L. Rousseau, and S.P.S. Porto, *First-Order Raman Effect in Wurtzite-Type Crystals*. Physical Review, 1969. **181**(3): p. 1351.
2. Serrano, J., et al., *Pressure dependence of the lattice dynamics of ZnO: An ab initio approach*. Physical Review B, 2004. **69**(9): p. 094306.
3. Cusc, R., et al., *Temperature dependence of Raman scattering in ZnO*. Physical Review B, 2007. **75**(16): p. 165202.
4. Xu, X., et al., *Evolutions of defects and blue-green emissions in ZnO microwhiskers fabricated by vapor-phase transport*. Journal of Physics and Chemistry of Solids, 2012. **73**(7): p. 858-862.
5. Djuricic, A.B., et al., *Defect emissions in ZnO nanostructures*. Nanotechnology, 2007. **18**(9).
